# Supplementary material for: Synergistic chemotherapy/photothermal therapy for cancer treatment using a co-delivery system of cisplatin and novel conjugated polymers
Source: Royal Society of Chemistry journal article supplement (doi:10.1039/d4py00502c), 2024-01-01
Supplement: d4py00502c1.pdf [file d4py00502c1.pdf]

Support information for:

# Synergistic Chemotherapy/Photothermal Therapy for Cancer Treatment Using a Co-Delivery System of Cisplatin and Novel Conjugated Polymers

Yaodong Di<sup>†a,b</sup>, Hanning Zhang<sup>†a</sup>, Zimu Luo<sup>c</sup>, Congshu Feng<sup>a</sup>, Xi Zhang<sup>a</sup>, Shuai Yang<sup>a</sup>, Jie Hou<sup>d</sup> and Lesan Yan<sup>a,b\*</sup>

<sup>a</sup> State Key Laboratory of Advanced Technology for Materials Synthesis and Processing, Biomedical Materials and Engineering Research Center of Hubei Province, Wuhan University of Technology, Wuhan 430070, China

<sup>b</sup> Wuhan University of Technology Advanced Engineering Technology Research Institute of Zhongshan City, Zhongshan 528400, China

<sup>c</sup> CGN Top (Hubei) New Materials Co., Ltd. Hanchuan 431615, China

<sup>d</sup> Shenzhen Baoan People's Hospital, Shenzhen 518101, China

<sup>†</sup>These authors contributed equally to this work.

Email: lsyan@whut.edu.cn

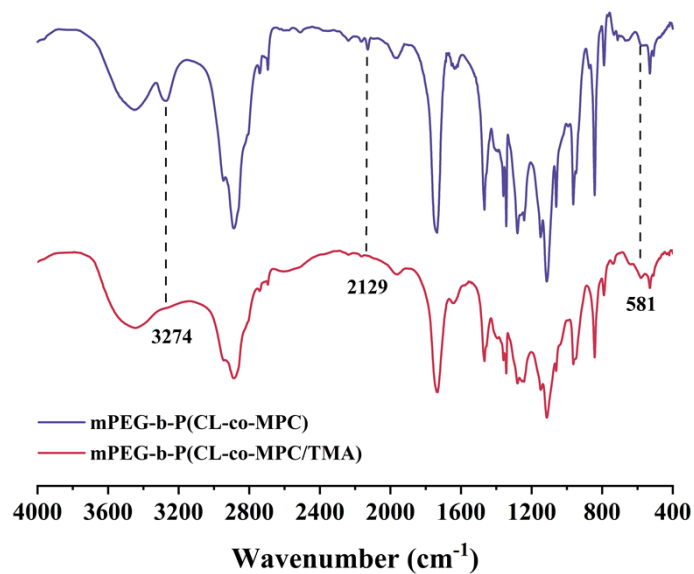

**Figure S1.** FT-IR spectra of mPEG-b-P(CL-co-MPC) and mPEG-b-P(CL-co-MPC/TMA).

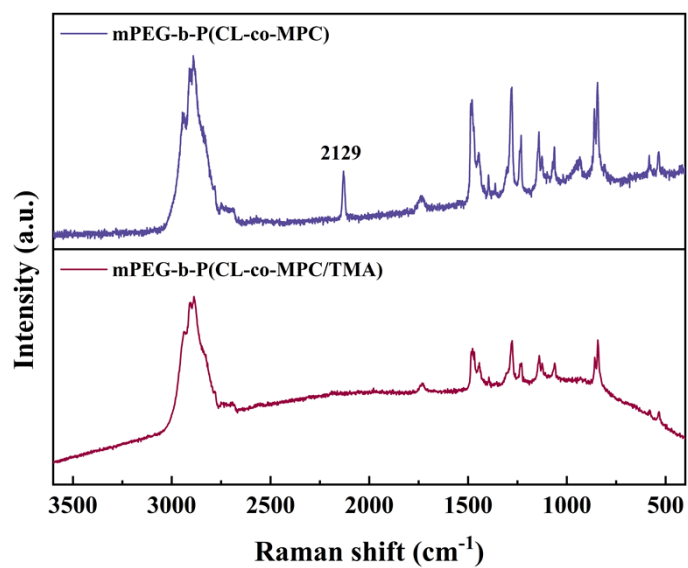

**Figure S2.** Raman spectra of mPEG-b-P(CL-co-MPC) and mPEG-b-P(CL-co-MPC/TMA) (Ex = 633 nm).

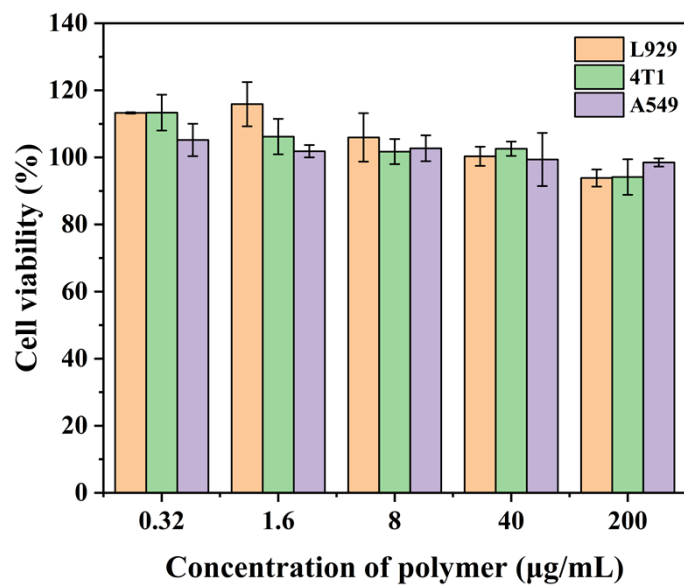

**Figure S3.** Cell survival rates of various cell types incubated with different concentrations of polymer micelles.

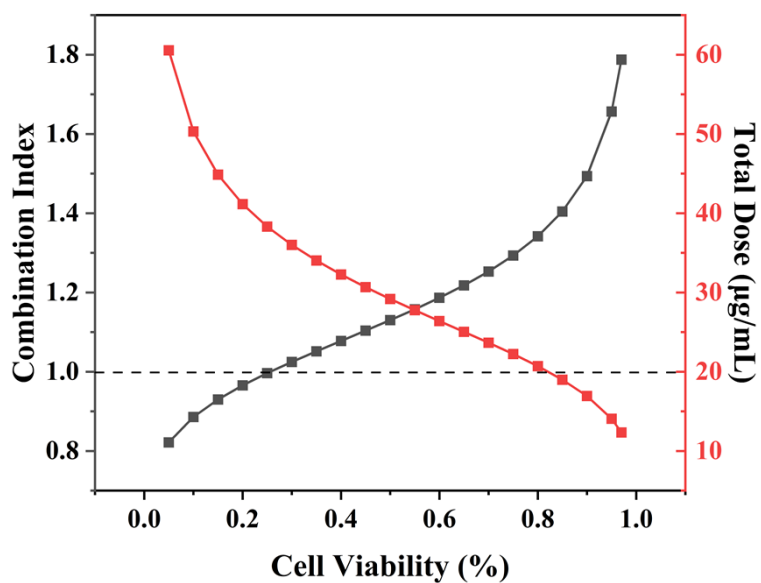

**Figure S4.** The relationship between the Combination Index of nanomicelles, 4T1 cell viability, and total drug dose.

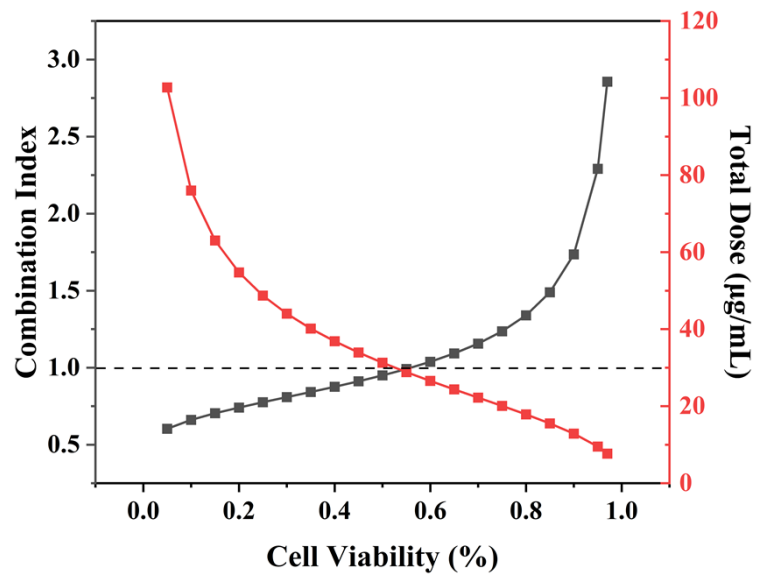

**Figure S5.** The relationship between the Combination Index of nanomicelles, A549 cell viability, and total drug dose.
